# Supplementary material for: Stress induced telomere shortening: longer life with less mutations?
Source: PubMed Central journal article supplement (PMC4015310; doi:10.1186/1752-0509-8-27), 2014-03-01

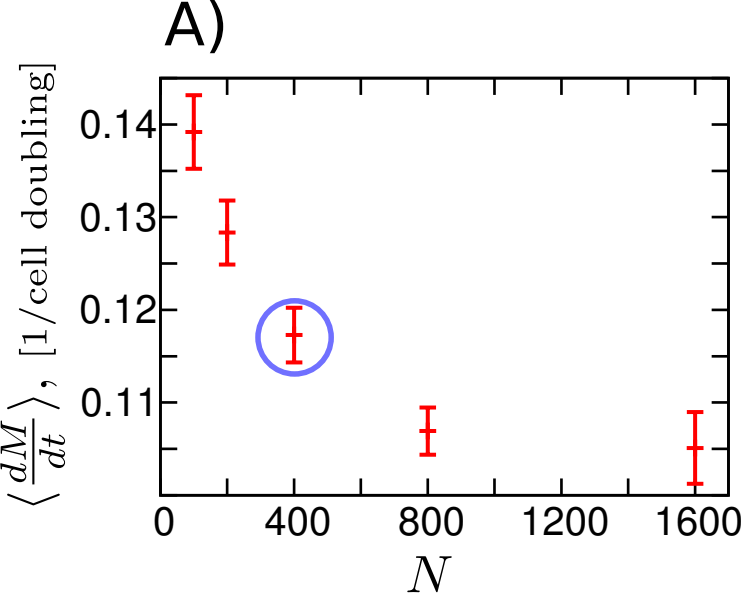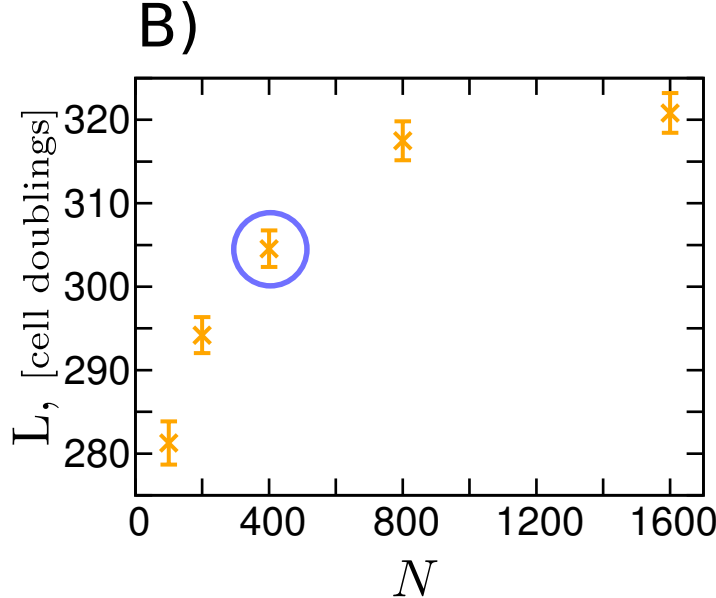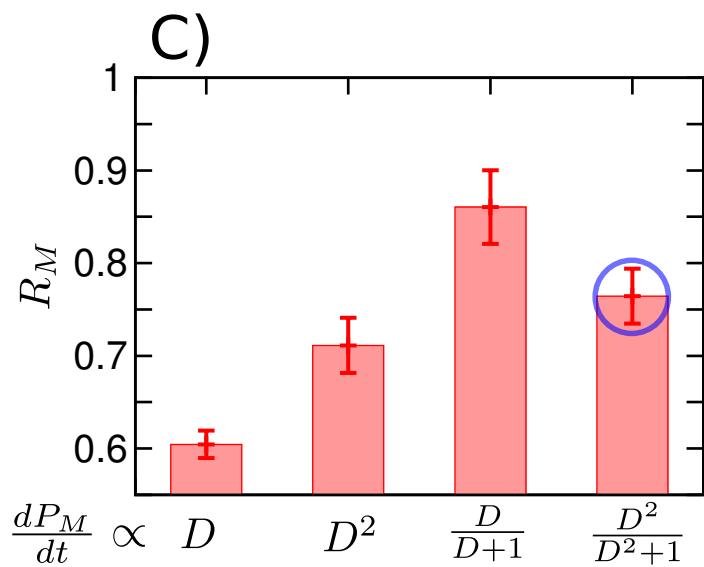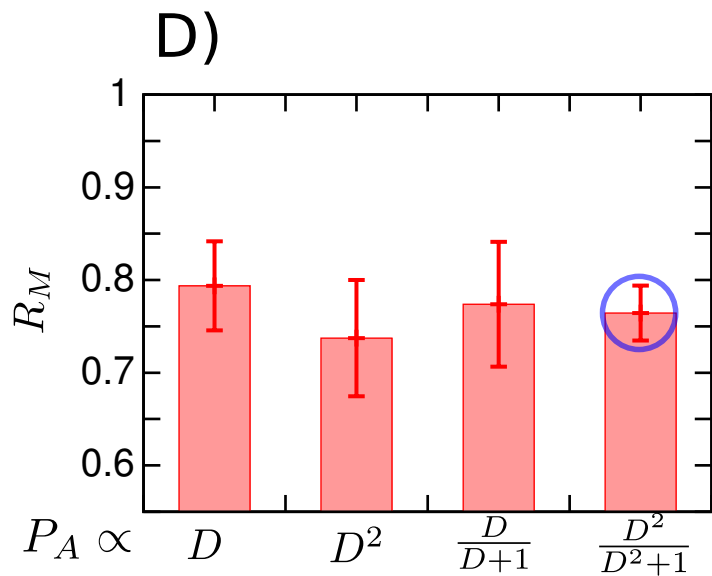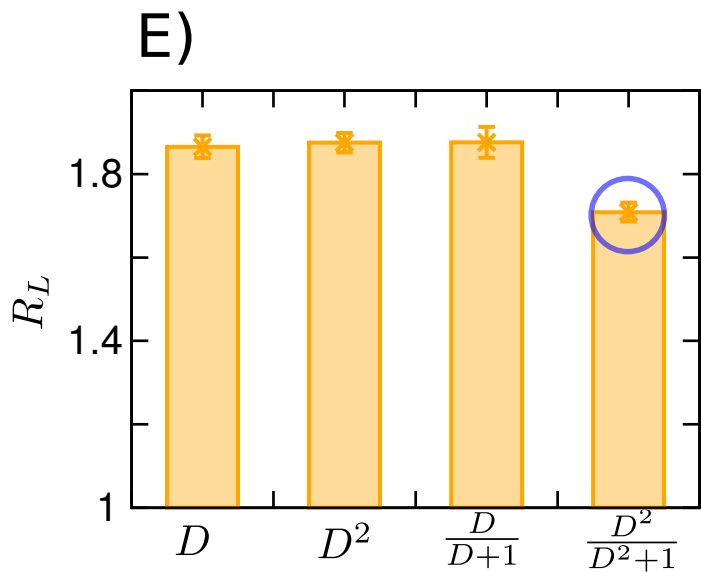

Supplement: 1752-0509-8-27-S1.pdf [file 1752-0509-8-27-S1.pdf]
